# Supplementary material
Source: Springer Nature journal article supplement (https://www.springermedizin.de/resource/supplementary/13058_2010_9465_MOESM13_ESM.pdf/9702232)
Supplement: MOESM13 [file 9702232]

**Table 2. Differentially expressed miRNAs among pooled RM, HN and DCIS.**

| microRNA         | HN vs. PRM  |                      | DCIS vs. PRM |                      | DCIS vs. HN |                      |
|------------------|-------------|----------------------|--------------|----------------------|-------------|----------------------|
|                  | Fold change | p-value <sup>a</sup> | Fold change  | p-value <sup>a</sup> | Fold change | p-value <sup>a</sup> |
| <b>let-7c</b>    | 15.23       | 3.46E-03             | 0.31         | 1.25E-01             | 0.03        | 1.19E-03             |
| <b>miR-7</b>     | 3.12        | 1.35E-01             | 22.35        | 1.53E-03             | 5.19        | 4.92E-02             |
| <b>miR-10b</b>   | 2.90        | 1.59E-01             | 0.82         | 7.82E-01             | 0.04        | 2.58E-03             |
| <b>miR-17-3p</b> | 19.04       | 2.14E-03             | 2.20         | 2.85E-01             | 0.12        | 1.73E-02             |
| <b>miR-18a</b>   | 1.91        | 3.76E-01             | 20.88        | 1.76E-03             | 3.53        | 1.12E-01             |
| <b>miR-21</b>    | 6.74        | 2.23E-02             | 55.20        | 2.64E-04             | 20.92       | 3.21E-03             |
| <b>miR-93</b>    | 7.53        | 1.72E-02             | 193.86       | 3.33E-05*            | 160.47      | 1.59E-04*            |
| miR-99a          | 1.90        | 3.79E-01             | 0.53         | 3.79E-01             | 0.02        | 9.19E-04             |
| miR-99b          | 3.08        | 1.39E-01             | 14.84        | 3.66E-03             | 6.24        | 3.33E-02             |
| <b>miR-125b</b>  | 0.93        | 9.24E-01             | 0.08         | 5.39E-03             | 0.05        | 4.03E-03             |
| <b>miR-127</b>   | 1.77        | 4.30E-01             | 0.25         | 7.81E-02             | 0.02        | 5.30E-04             |
| miR-130a         | 0.29        | 1.06E-01             | 0.01         | 1.38E-04*            | 0.09        | 1.01E-02             |
| <b>miR-145</b>   | 3.00        | 1.47E-01             | 0.80         | 7.52E-01             | 0.03        | 1.20E-03             |
| <b>miR-181b</b>  | 3.40        | 1.11E-01             | 14.90        | 3.64E-03             | 5.46        | 4.42E-02             |
| <b>miR-182</b>   | 2.00        | 3.45E-01             | 106.24       | 8.54E-05             | 72.35       | 4.55E-04             |
| miR-183          | 2.52        | 2.15E-01             | 19.06        | 2.14E-03             | 51.88       | 7.38E-04             |
| <b>miR-191</b>   | 6.75        | 2.23E-02             | 78.21        | 1.43E-04*            | 31.59       | 1.60E-03             |
| <b>miR-193b</b>  | 2.20        | 2.84E-01             | 15.67        | 3.25E-03             | 6.87        | 2.73E-02             |
| <b>miR-195</b>   | 1.37        | 6.57E-01             | 0.06         | 2.78E-03             | 0.13        | 2.15E-02             |
| <b>miR-200b</b>  | 1.70        | 4.63E-01             | 6.07         | 2.86E-02             | 51.31       | 7.50E-04             |
| <b>miR-200c</b>  | 1.90        | 3.80E-01             | 26.41        | 1.08E-03             | 19.98       | 3.48E-03             |
| <b>miR-204</b>   | 0.77        | 7.12E-01             | 0.04         | 1.32E-03             | 0.08        | 8.12E-03             |
| miR-324-5p       | 2.86        | 1.64E-01             | 24.38        | 1.28E-03             | 92.53       | 3.24E-04             |
| <b>miR-365</b>   | 4.05        | 7.45E-02             | 17.65        | 2.51E-03             | 25.05       | 2.35E-03             |
| miR-376a         | 0.45        | 2.73E-01             | 0.06         | 3.14E-03             | 0.24        | 7.91E-02             |
| miR-382          | 2.03        | 3.32E-01             | 0.11         | 1.20E-02             | 0.06        | 4.71E-03             |
| <b>miR-383</b>   | 0.05        | 2.15E-03             | 0.01         | 1.58E-04*            | 0.62        | 5.18E-01             |
| miR-410          | 0.96        | 9.56E-01             | 0.15         | 2.33E-02             | 0.00        | 1.11E-04*            |
| miR-425-5p       | 1.38        | 6.57E-01             | 9.47         | 1.01E-02             | 74.46       | 4.37E-04             |
| miR-449a         | 10.65       | 7.71E-03             | 15.12        | 3.52E-03             | 2.53        | 2.23E-01             |
| miR-449b         | 0.79        | 7.37E-01             | 11.57        | 6.39E-03             | 21.20       | 3.13E-03             |
| miR-486          | 0.02        | 2.06E-04*            | 0.01         | 9.73E-05*            | 0.34        | 1.65E-01             |
| miR-489          | 0.06        | 2.73E-03             | 0.10         | 8.61E-03             | 0.25        | 8.62E-02             |
| miR-511          | 0.40        | 2.20E-01             | 0.07         | 3.72E-03             | 0.18        | 4.11E-02             |
| miR-517c         | 0.07        | 3.48E-03             | 0.01         | 1.29E-04*            | 0.36        | 1.82E-01             |

Note: Fold change in expression between comparisons was considered significant if  $p < 0.005$ , <sup>a</sup>p-value determined by Student's t-test; \* $p < 0.00025$ ; miRNAs in **bold** have been previously implicated in invasive breast cancer.
